# Supplementary material for: Nusinersen mitigates neuroinflammation in severe spinal muscular atrophy patients
Source: PubMed Central journal article supplement (PMC9932014; doi:10.1038/s43856-023-00256-2), 2023-02-15
Supplement: 43856_2023_256_MOESM1_ESM.pdf [file 43856_2023_256_MOESM1_ESM.pdf]

## **Description of Additional Supplementary Files**

**File Name:** Supplementary Data 1

**Description:** Source data for the main figures
