# Supplementary material for: Nusinersen mitigates neuroinflammation in severe spinal muscular atrophy patients
Source: PubMed Central journal article supplement (PMC9932014; doi:10.1038/s43856-023-00256-2), 2023-02-15
Supplement: 43856_2023_256_MOESM2_ESM.pdf [file 43856_2023_256_MOESM2_ESM.pdf]

Supplementary information for

## Nusinersen mitigates neuroinflammation in severe Spinal Muscular Atrophy patients

Tommaso Nuzzo<sup>1,2,\*</sup>, Rosita Russo<sup>1,\*</sup>, Francesco Errico<sup>2,3,\*</sup>, Adele D'Amico<sup>4,\*</sup>, Awet G. Tewelde<sup>1</sup>, Mariangela Valletta<sup>1</sup>, Amber Hassan<sup>2</sup>, Michele Tosi<sup>4</sup>, Chiara Panicucci<sup>5</sup>, Claudio Bruno<sup>5,6</sup>, Enrico Bertini<sup>4</sup>, Angela Chambery<sup>1</sup>, Livio Pellizzoni<sup>7,8,9</sup>, Alessandro Usiello<sup>1,2,@</sup>

<sup>1</sup>Department of Environmental, Biological and Pharmaceutical Science and Technologies, Università degli Studi della Campania "Luigi Vanvitelli", Caserta, Italy.

<sup>2</sup>Laboratory of Translational Neuroscience, Ceinge Biotechnologie Avanzate, Naples, Italy.

<sup>3</sup>Department of Agricultural Sciences, University of Naples "Federico II", Portici, Italy.

<sup>4</sup>Unit of Neuromuscular and Neurodegenerative Disorders, Dept. Neurosciences, Bambino Gesù Children's Hospital IRCCS, Roma, Italy.

<sup>5</sup>Center of Translational and Experimental Myology, IRCCS Istituto Giannina Gaslini, Genova, Italy.

<sup>6</sup>Department of Neuroscience, Rehabilitation, Ophthalmology, Genetics, Maternal, and Child Health - DINOEMI, University of Genova

<sup>7</sup>Center for Motor Neuron Biology and Disease, Columbia University, New York, NY, USA.

<sup>8</sup>Department of Pathology and Cell Biology, Columbia University, New York, NY, USA.

<sup>9</sup>Department of Neurology, Columbia University, New York, NY, USA.

\*These authors contributed equally.

@Corresponding Author:

Alessandro Usiello, Ph.D.: Department of Environmental, Biological and Pharmaceutical Sciences and Technologies, University of Campania "Luigi Vanvitelli", Via A. Vivaldi, 43, 81100 Caserta, Italy, and CEINGE Biotechnologie Avanzate, Naples, Italy; Phone: +39 0813737879, email: [usiello@ceinge.unina.it](mailto:usiello@ceinge.unina.it); [alessandro.usiello@unicampanina.it](mailto:alessandro.usiello@unicampanina.it)

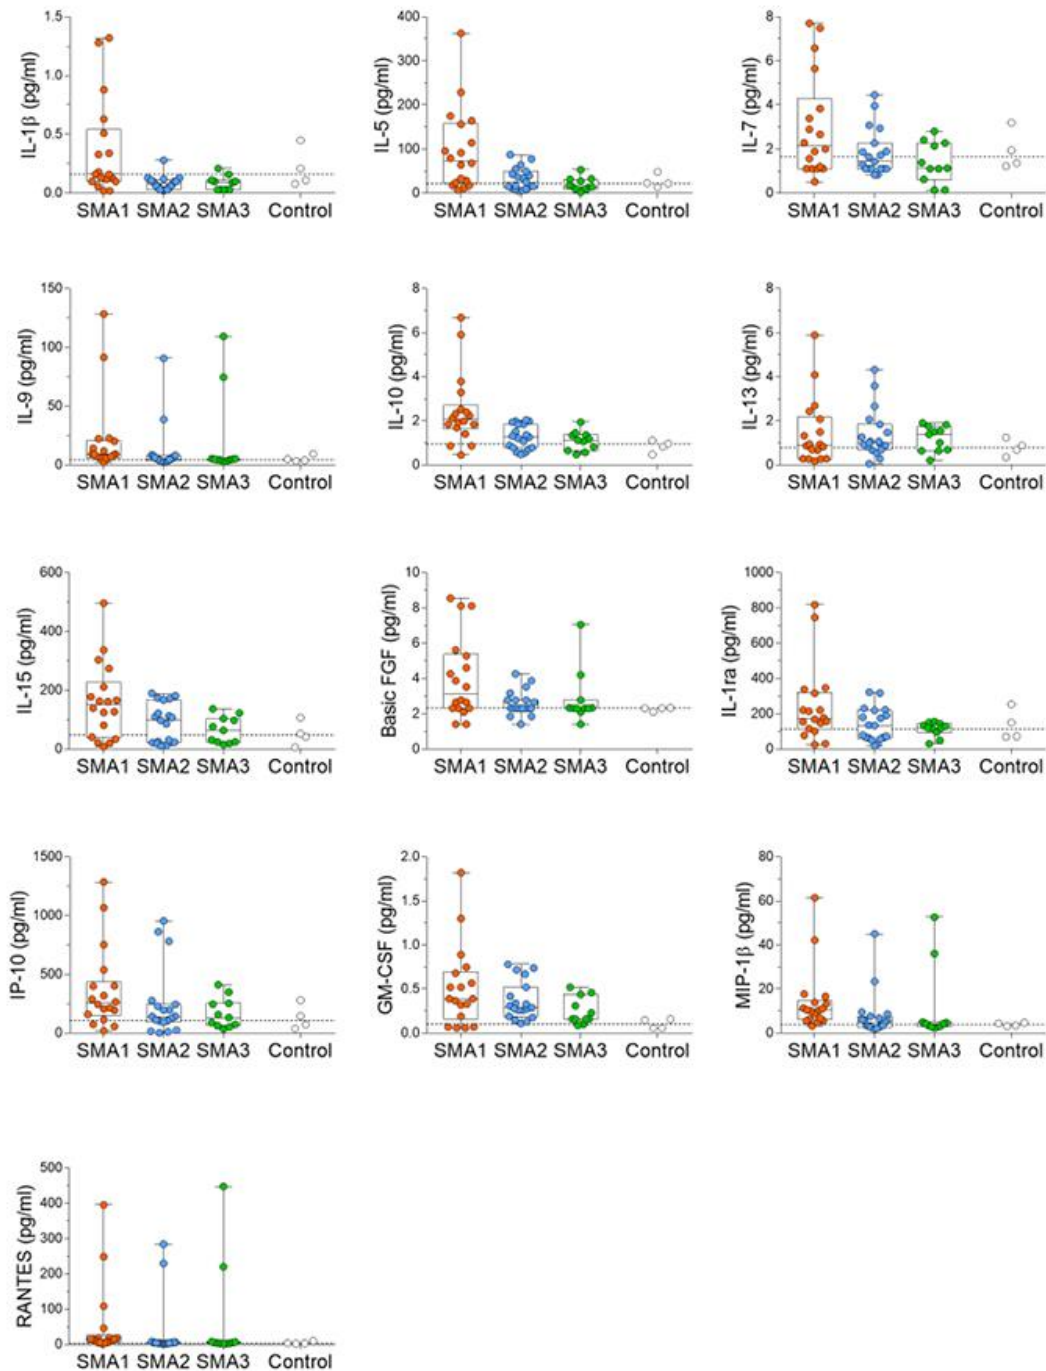

**Supplementary Figure 1.** Levels of cytokines and neurotrophic factors that do not differ in the CSF of naïve SMA types 1, 2 and 3 patients. CSF levels of interleukin (IL)-1 $\beta$ , IL-5, IL-7, IL-9, IL-10, IL-13, IL-15, basic fibroblast growth factor (FGF-basic), IL-1ra, IP-10, granulocyte macrophage colony stimulating factor (GM-CSF), macrophage inflammatory protein 1-beta (MIP-1 $\beta$ ) and RANTES in untreated SMA1 (n=18), SMA2 (n=19) and SMA3 (n=11) patients. Controls (n=4) were used as a reference for physiological baseline levels. Data were analyzed by ANCOVA considering the effect of different factors (age, sex, BMI, *SMN2* copy number, gastrostomy, NIV, and tracheostomy). Data are shown as box and whisker plots representing median with interquartile range (IQR). Dots represent individual patients' values. The dotted line represents the median of control samples.

## SMA1

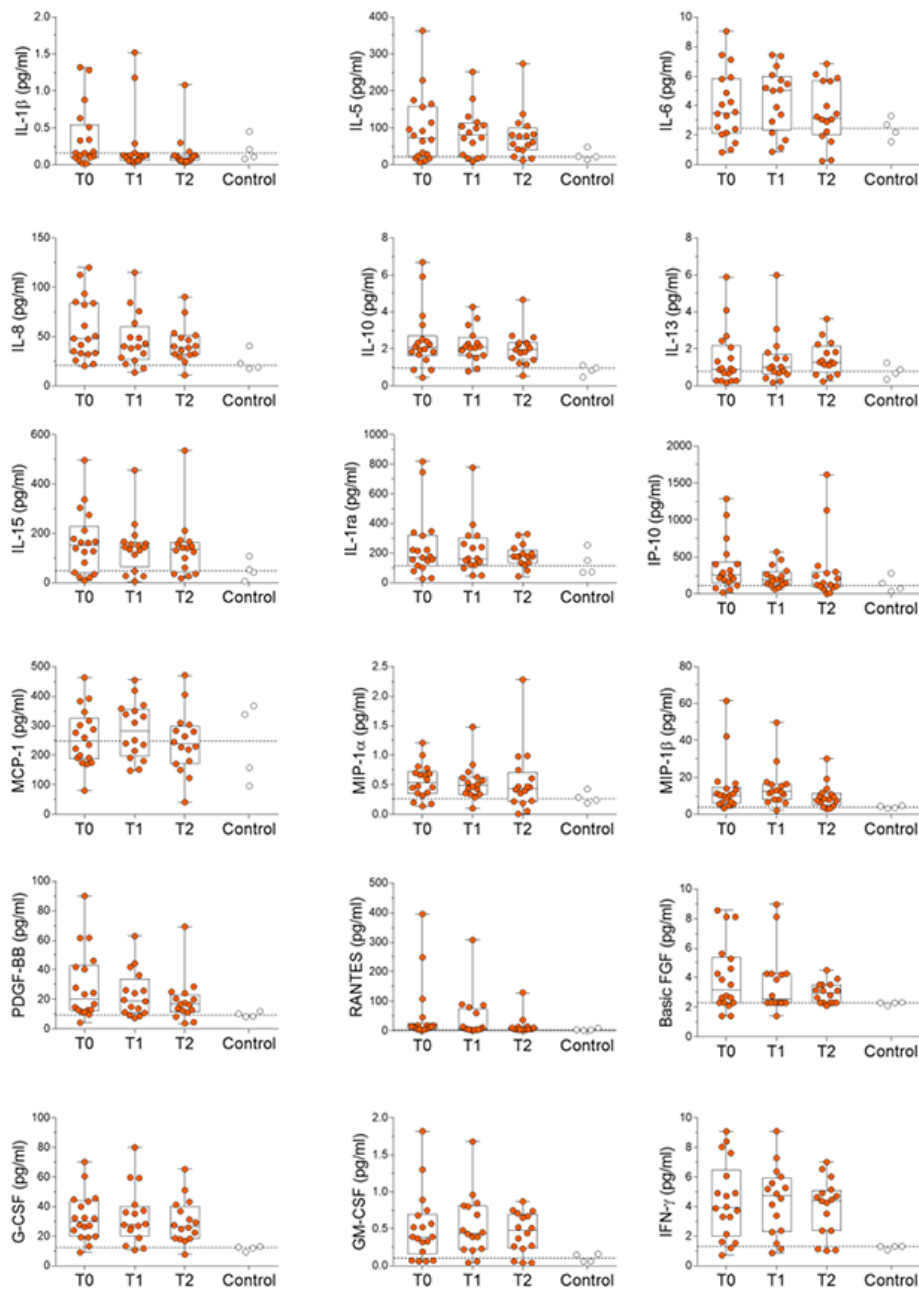

**Supplementary Figure 2.** Levels of cytokines and neurotrophic factors that are unaffected by Nusinersen treatment in the CSF of SMA1 patients. Box and whisker plots showing unaltered CSF levels of IL-1 $\beta$ , IL-5, IL-6, IL-8, IL-10, IL-13, IL-15, IL-1ra, IP-10, MCP-1, MIP-1 $\alpha$ , MIP-1 $\beta$ , PDGF-BB, RANTES, FGF-basic, G-CSF, GM-CSF and IFN- $\gamma$  in SMA1 patients prior to treatment (T0) and at the time of the fourth (T1) and sixth (T2) injection of Nusinersen. Controls (n=4) were used as a reference for physiological baseline levels of cytokines. Data are analyzed by Wilcoxon matched-pairs signed ranks test and shown as box and whisker plots representing median with interquartile range (IQR). Dots represent individual patients' values. The dotted line represents the median of control samples.

## SMA2

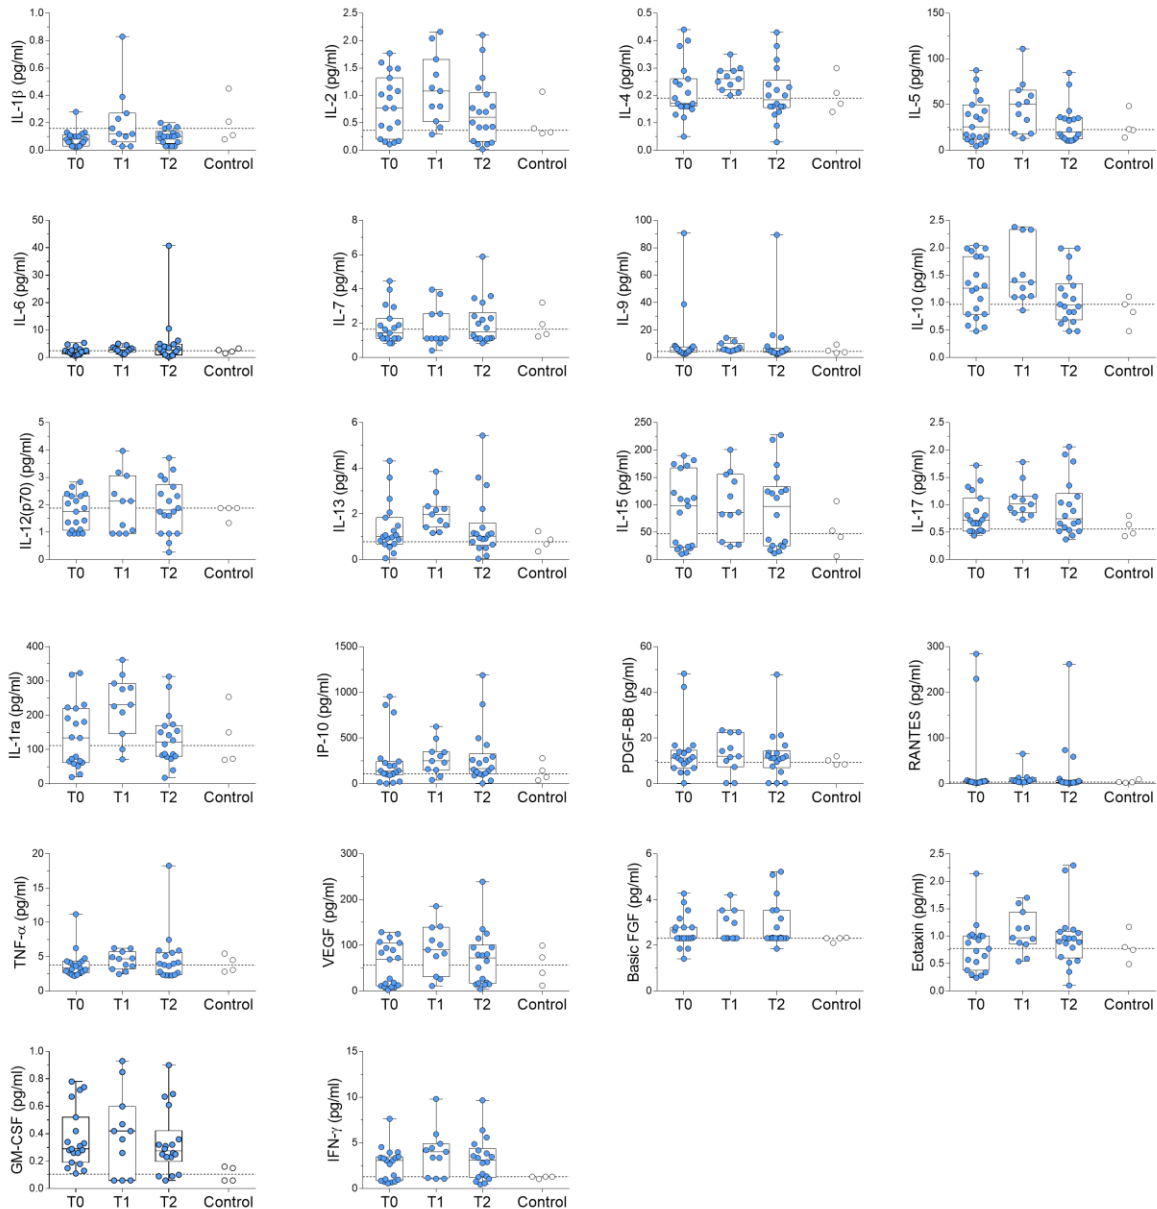

**Supplementary Figure 3.** Levels of cytokines and neurotrophic factors that are unaltered by Nusinersen treatment in the CSF of SMA2 patients. Unaltered CSF levels of interleukin IL-1 $\beta$ , IL-2, IL-4, IL-5, IL-6, IL-7, IL-9, IL-10, IL-12 (p70), IL-13, IL-15, IL-17A, IL-1ra, IP-10, PDGF-BB, RANTES, TNF $\alpha$ , VEGF, FGF-basic, Eotaxin, GM-CSF and IFN- $\gamma$  cytokines in SMA2 patients prior to treatment (T0) and at T1 and T2 of Nusinersen treatment. Controls (n=4) were used as a reference for physiological baseline levels of cytokines. Data are analyzed by Wilcoxon matched-pairs signed ranks test and shown as box and whisker plots representing median with interquartile range (IQR). Dots represent individual patients' values. The dotted line represents the median of control samples.

### SMA3

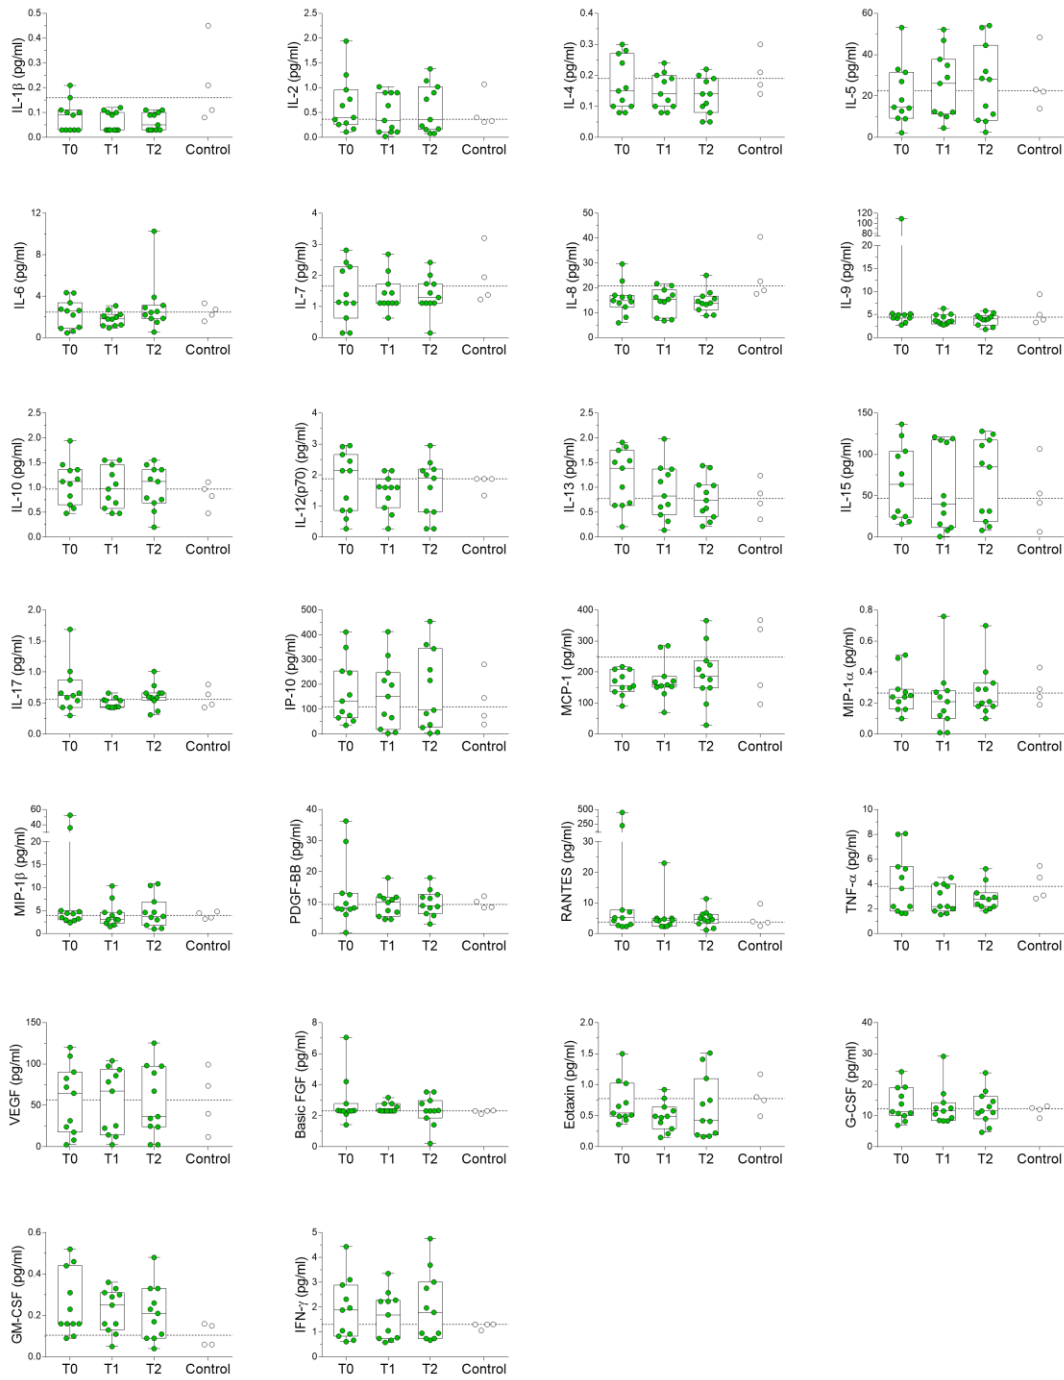

**Supplementary Figure 4.** Levels of cytokines and neurotrophic factors that are unaltered by Nusinersen treatment in the CSF of SMA3 patients. Box and whisker plots showing the CSF levels of IL-1 $\beta$ , IL-2, IL-4, IL-5, IL-6, IL-7, IL-8, IL-9, IL-10, IL-12 (p70), IL-13, IL-15, IL-17A, IP-10, MCP-1, MIP-1 $\alpha$ , MIP-1 $\beta$ , PDGF-BB, RANTES, TNF- $\alpha$ , VEGF, FGF-basic, Eotaxin, G-CSF, GM-CSF, and IFN- $\gamma$  in SMA3 patients prior to treatment (T0) and at the time of the fourth (T1) and sixth (T2) injection of Nusinersen. Controls (n=4) were used as a reference for physiological baseline levels of cytokines. Data are analyzed by Wilcoxon matched-pairs signed ranks test and shown as box and whisker plots representing median with interquartile range (IQR). Dots represent individual patients' values. The dotted line represents the median of control sample.

**Supplementary Table 1.** Clinical characteristics of SMA subjects enrolled in the study at fourth (T1) and sixth (T2) injection of Nusinersen.

| SMA | Nusinersen | CHOP-INTEND |                         | HFMSE    |                         | Gastrostomy |            | NIV       |            | Tracheostomy |            | CSF total proteins (µg/µl) |                         | CSF pH   |                         |
|-----|------------|-------------|-------------------------|----------|-------------------------|-------------|------------|-----------|------------|--------------|------------|----------------------------|-------------------------|----------|-------------------------|
|     |            | <i>n</i>    | <i>Median [Min;Max]</i> | <i>n</i> | <i>Median [Min;Max]</i> | <i>No</i>   | <i>Yes</i> | <i>No</i> | <i>Yes</i> | <i>No</i>    | <i>Yes</i> | <i>n</i>                   | <i>Median [Min;Max]</i> | <i>n</i> | <i>Median [Min;Max]</i> |
| 1   | T0         | 18          | 7.5[0;52]               |          |                         | 4           | 14         | 12        | 6          | 10           | 8          | 18                         | 0.18[0.077;0.981]       | 18       | 8.82[7.74;9.09]         |
|     | T1         | 14          | 9[0;64]                 |          |                         | 3           | 13         | 9         | 7          | 9            | 7          | 15                         | 0.19[0.069;0.618]       | 15       | 8.82[8.44;9.34]         |
|     | T2         | 16          | 12[0;64]                |          |                         | 3           | 13         | 9         | 7          | 9            | 7          | 16                         | 0.23[0.124;0.541]       | 16       | 8.93[8.22;9.09]         |
| 2   | T0         |             |                         | 19       | 9[2;41]                 | 19          | 0          | 12        | 7          | 19           | 0          | 19                         | 0.18[0.121;0.497]       | 19       | 8.79[7.6;9.29]          |
|     | T1         |             |                         | 7        | 7[2;23]                 | 11          | 0          | 7         | 4          | 11           | 0          | 11                         | 0.22[0.101;0.402]       | 11       | 8.98[7.61;9.27]         |
|     | T2         |             |                         | 17       | 13[2;57]                | 18          | 0          | 12        | 6          | 18           | 0          | 16                         | 0.22[0.084;0.825]       | 16       | 8.79[8.05;9.44]         |
| 3   | T0         |             |                         | 11       | 45[15;62]               | 11          | 0          | 10        | 1          | 11           | 0          | 11                         | 0.18[0.044;0.65]        | 11       | 8.87[8.15;9.17]         |
|     | T1         |             |                         | 9        | 39[17;62]               | 11          | 0          | 11        | 0          | 11           | 0          | 11                         | 0.16[0.094;0.481]       | 11       | 8.82[8.52;9.17]         |
|     | T2         |             |                         | 11       | 48[14;62]               | 11          | 0          | 10        | 1          | 11           | 0          | 11                         | 0.14[0.045;0.481]       | 11       | 8.89[8.77;9.05]         |

Values are expressed as median (min max). For gastrostomy, tracheostomy and NIV, number of subjects (n) is indicated. Statistical analyses were performed by Mann-Whitney test. Abbreviations: CHOP-INTEND = Children's Hospital Of Philadelphia Infant Test Of Neuromuscular Disorders; HFMSE = Hammersmith Functional Motor Scale Expanded; NIV= Non-invasive ventilation; CSF = Cerebrospinal fluid.

**Supplementary Table 2.** Cerebrospinal fluid cytokines and neurotrophic factors levels (expressed as pg/ml) compared among the different naive SMA types.

| Analyte (pg/ml) | Control (n=4)        | SMA1 (n=18)           | SMA2 (n=19)          | SMA3 (n=11)          | ANCOVA   |                | Bonferroni ( <i>p</i> value) |                      |              |
|-----------------|----------------------|-----------------------|----------------------|----------------------|----------|----------------|------------------------------|----------------------|--------------|
|                 | Median [Min;Max]     | Median [Min;Max]      | Median [Min;Max]     | Median [Min;Max]     | F (2,44) | <i>p</i> value | SMA1 vs SMA2                 | SMA1 vs SMA3         | SMA2 vs SMA3 |
| Basic FGF       | 2.3[2.1;2.34]        | 3.15[1.41;8.55]       | 2.3[1.41;4.27]       | 2.3[1.41;7.05]       | 0.137    | 0.873          | -                            | -                    | -            |
| Eotaxin         | 0.77[0.49;1.17]      | 1.42[0.31;3.5]        | 0.77[0.24;2.14]      | 0.54[0.36;1.5]       | 9.764    | <b>0.0004</b>  | <b>0.040*</b>                | <b>0.005**</b>       | 1.00         |
| G-CSF           | 12.25[9.17;13.08]    | 29.79[9;70.33]        | 18.27[5.53;31.95]    | 11.28[6.93;24.18]    | 5.700    | <b>0.007</b>   | <b>0.0005**</b>              | <b>0.0002**</b>      | 1.00         |
| GM-CSF          | 0.1[0.05;0.16]       | 0.39[0.06;1.82]       | 0.29[0.11;0.78]      | 0.16[0.09;0.52]      | 3.124    | 0.056          | -                            | -                    | -            |
| IFN- $\gamma$   | 1.3[1.06;1.31]       | 3.93[0.71;9.09]       | 3.06[0.57;7.63]      | 1.88[0.61;4.43]      | 3.683    | <b>0.035</b>   | <b>0.032*</b>                | <b>0.007**</b>       | 1.00         |
| IL-10           | 0.9[0.48;1.11]       | 2.06[0.45;6.69]       | 1.26[0.48;2.04]      | 1.12[0.48;1.94]      | 2.786    | 0.075          | -                            | -                    | -            |
| IL-12(p70)      | 1.88[1.34;1.9]       | 3[0.86;11.2]          | 1.75[0.95;2.83]      | 2.14[0.27;2.95]      | 5.051    | <b>0.012</b>   | <b>0.003**</b>               | <b>0.011*</b>        | 1.00         |
| IL-13           | 0.78[0.35;1.23]      | 0.9[0.17;5.89]        | 1[0.06;4.32]         | 1.39[0.21;1.91]      | 0.548    | 0.583          | -                            | -                    | -            |
| IL-15           | 47.2[6.43;106.72]    | 150.11[8.16;496.74]   | 97.82[10.36;189.57]  | 63.5[15.83;136.62]   | 1.396    | 0.261          | -                            | -                    | -            |
| IL-17           | 0.64[0.43;1.98]      | 1.55[0.44;3.21]       | 0.72[0.44;1.72]      | 0.62[0.3;1.69]       | 6.809    | <b>0.003</b>   | <b>0.0007**</b>              | <b>0.0007**</b>      | 1.00         |
| IL-1 $\beta$    | 0.15[0.08;0.45]      | 0.16[0.02;1.32]       | 0.08[0.02;0.28]      | 0.09[0.03;0.21]      | 0.723    | 0.492          | -                            | -                    | -            |
| IL-1ra          | 111.65[69.85;253.59] | 173.13[25.52;818.72]  | 133.74[19.67;323.33] | 120.33[30.69;156.32] | 2.017    | 0.148          | -                            | -                    | -            |
| IL-2            | 0.36[0.31;1.07]      | 1.7[0.17;5.64]        | 0.77[0.11;1.77]      | 0.4[0.11;1.94]       | 3.320    | <b>0.048</b>   | <b>0.001**</b>               | <b>0.002**</b>       | 1.00         |
| IL-4            | 0.19[0.14;0.3]       | 0.25[0.03;0.73]       | 0.17[0.05;0.44]      | 0.15[0.08;0.3]       | 4.047    | <b>0.026</b>   | 0.086                        | <b>0.029*</b>        | 1.00         |
| IL-5            | 22.64[13.94;48.38]   | 73.96[7.04;362.81]    | 25.57[4.53;87.56]    | 14.62[2.22;53.14]    | 2.395    | 0.106          | -                            | -                    | -            |
| IL-6            | 2.46[1.57;3.3]       | 3.51[0.85;9.04]       | 2.18[0.63;5.37]      | 2.58[0.45;4.33]      | 3.388    | <b>0.045</b>   | <b>0.019*</b>                | 0.050                | 1.00         |
| IL-7            | 1.65[1.23;3.2]       | 2.15[0.52;7.71]       | 1.44[0.84;4.46]      | 1.14[0.15;2.81]      | 1.146    | 0.329          | -                            | -                    | -            |
| IL-8            | 20.82[17.61;40.51]   | 47.67[20.24;120.04]   | 20.56[8.92;43.6]     | 14.91[5.95;29.62]    | 4.336    | <b>0.021</b>   | <b>&lt;0.0001***</b>         | <b>&lt;0.0001***</b> | 0.93         |
| IL-9            | 4.44[3.31;9.43]      | 9.09[2.23;128.48]     | 5.1[2.61;90.72]      | 4.95[2.74;109.39]    | 1.075    | 0.352          | -                            | -                    | -            |
| IP-10           | 110.3[38.84;281.16]  | 255.71[20.47;1287.46] | 141.45[3.47;955.22]  | 132.92[35.8;411.42]  | 6.986    | <b>0.003</b>   | 0.586                        | 0.236                | 1.00         |
| MCP-1           | 248.02[96.51;367.49] | 247.6[80.78;463.24]   | 168.61[95.19;477.39] | 155.63[90.35;217.4]  | 4.673    | <b>0.016</b>   | 0.104                        | <b>0.013*</b>        | 0.79         |
| MIP-1 $\alpha$  | 0.26[0.18;0.43]      | 0.53[0.14;1.21]       | 0.25[0.06;0.48]      | 0.24[0.1;0.51]       | 8.328    | <b>0.001</b>   | <b>0.0002**</b>              | <b>0.001**</b>       | 1.00         |
| MIP-1 $\beta$   | 3.98[3.18;4.81]      | 10.44[3.32;61.43]     | 4.97[1.85;45.1]      | 4.34[2.35;52.63]     | 1.977    | 0.154          | -                            | -                    | -            |
| PDGF-BB         | 10.28[8.37;35.79]    | 20.14[4.28;89.97]     | 11.31[0.3;48.21]     | 8.29[0.3;36.29]      | 5.025    | <b>0.012</b>   | <b>0.027*</b>                | <b>0.044*</b>        | 1.00         |
| RANTES          | 3.77[2.49;9.75]      | 14.31[1.26;395.48]    | 4.77[1.83;284.35]    | 5.12[2.27;447.93]    | 0.724    | 0.492          | -                            | -                    | -            |
| TNF- $\alpha$   | 3.8[2.83;5.45]       | 6.05[2.56;18]         | 3.37[2.19;11.2]      | 3.64[1.63;8.06]      | 4.396    | <b>0.019</b>   | <b>0.012*</b>                | <b>0.047*</b>        | 1.00         |
| VEGF            | 56.73[11.85;99.29]   | 124.11[2.37;370.44]   | 69.28[2.37;128.92]   | 64.74[2.37;120]      | 4.638    | <b>0.016</b>   | <b>0.003**</b>               | <b>0.011*</b>        | 1.00         |

Values are expressed as median (min; max). Statistical analyses were performed by ANCOVA considering the effect of age, sex, BMI, SMN2 copy, gastrostomy, NIV/tracheostomy, followed by Bonferroni multiple comparisons when required. Significant *p* values are shown in bold (\* *p*<0.05, \*\**p*<0.01, \*\*\**p*<0.0001).

**Supplementary Table 3.** Comparisons of cytokines and neurotrophic factors levels between subjects with or without gastrostomy, Non-invasive ventilation (NIV) or tracheostomy within each SMA type and treatment group. Uncorrected *p* values obtained by Mann-Whitney test are reported. All *p* values are not significant after correction with Benjamini-Hochberg multiple comparisons.

| Analyte        | SMA1                           |                                |                                |                                |                                |                                |                                |                                |                                | SMA2                           |                                |                                |
|----------------|--------------------------------|--------------------------------|--------------------------------|--------------------------------|--------------------------------|--------------------------------|--------------------------------|--------------------------------|--------------------------------|--------------------------------|--------------------------------|--------------------------------|
|                | T0                             | T1                             | T2                             | T0                             | T1                             | T2                             | T0                             | T1                             | T2                             | T0                             | T1                             | T2                             |
|                | Gastrostomy                    |                                |                                | NIV                            |                                |                                | Tracheostomy                   |                                |                                | NIV                            |                                |                                |
|                | Yes vs No<br>( <i>p</i> value) | Yes vs No<br>( <i>p</i> value) | Yes vs No<br>( <i>p</i> value) | Yes vs No<br>( <i>p</i> value) | Yes vs No<br>( <i>p</i> value) | Yes vs No<br>( <i>p</i> value) | Yes vs No<br>( <i>p</i> value) | Yes vs No<br>( <i>p</i> value) | Yes vs No<br>( <i>p</i> value) | Yes vs No<br>( <i>p</i> value) | Yes vs No<br>( <i>p</i> value) | Yes vs No<br>( <i>p</i> value) |
| Basic FGF      | 0.873                          | 0.944                          | 0.583                          | 0.511                          | 0.406                          | 0.215                          | 0.448                          | 0.956                          | 0.388                          | 0.515                          | 0.918                          | 0.845                          |
| Eotaxin        | 0.167                          | 0.346                          | 0.500                          | 0.512                          | 0.185                          | 0.039                          | 0.594                          | 0.203                          | 0.071                          | 0.139                          | 0.186                          | 0.160                          |
| G-CSF          | 0.167                          | 0.840                          | 0.253                          | 0.349                          | 0.223                          | 0.315                          | 0.790                          | 0.491                          | 0.427                          | 0.118                          | 0.257                          | 0.512                          |
| GM-CSF         | 0.264                          | 0.501                          | 0.946                          | 1.000                          | 0.397                          | 0.634                          | 0.350                          | 0.491                          | 0.791                          | 0.767                          | 0.704                          | 0.851                          |
| IFN- $\gamma$  | 0.137                          | 0.946                          | 0.252                          | 0.075                          | 0.491                          | 0.112                          | 0.657                          | 0.874                          | 0.289                          | 0.422                          | 0.776                          | 0.512                          |
| IL-10          | 0.832                          | 0.545                          | 0.736                          | 0.606                          | 0.427                          | 0.596                          | 0.756                          | 0.185                          | 0.289                          | 0.472                          | 0.184                          | 0.091                          |
| IL-12(p70)     | 0.832                          | 0.382                          | 0.458                          | 0.925                          | 0.030                          | 0.203                          | 0.929                          | 0.039                          | 0.671                          | 0.766                          | 0.251                          | 0.707                          |
| IL-13          | 0.288                          | 0.637                          | 0.946                          | 0.425                          | 0.266                          | 0.711                          | 0.894                          | 0.314                          | 0.491                          | 0.472                          | 0.571                          | 0.888                          |
| IL-15          | 1.000                          | 0.946                          | 0.201                          | 0.779                          | 0.711                          | 0.958                          | 0.790                          | 0.315                          | 0.634                          | 0.554                          | 0.850                          | 0.223                          |
| IL-17          | 0.222                          | 0.382                          | 0.543                          | 0.174                          | 0.289                          | 0.457                          | 0.790                          | 0.340                          | 0.671                          | 0.832                          | 0.344                          | 0.399                          |
| IL-1 $\beta$   | 0.831                          | 0.172                          | 0.945                          | 0.963                          | 0.485                          | 0.554                          | 0.894                          | 0.237                          | 0.872                          | 0.831                          | 0.296                          | 0.538                          |
| IL-1ra         | 0.595                          | 0.893                          | 0.252                          | 0.673                          | 0.832                          | 0.791                          | 0.965                          | 0.791                          | 0.711                          | 0.237                          | 0.345                          | 0.399                          |
| IL-2           | 0.750                          | 0.736                          | 0.736                          | 0.574                          | 0.958                          | 0.671                          | 0.424                          | 0.711                          | 0.791                          | 0.310                          | 0.185                          | 0.281                          |
| IL-4           | 0.288                          | 0.686                          | 0.788                          | 0.606                          | 0.185                          | 0.458                          | 0.689                          | 0.340                          | 0.958                          | 0.445                          | 0.636                          | 0.962                          |
| IL-5           | 0.671                          | 0.840                          | 0.840                          | 0.925                          | 0.958                          | 0.315                          | 0.657                          | 0.427                          | 0.223                          | 0.352                          | 0.185                          | 0.134                          |
| IL-6           | 0.915                          | 0.459                          | 0.201                          | 1.000                          | 0.874                          | 0.791                          | 0.929                          | 0.874                          | 0.634                          | 0.447                          | 0.705                          | 0.851                          |
| IL-7           | 0.240                          | 0.946                          | 0.456                          | 0.962                          | 0.138                          | 0.165                          | 0.304                          | 0.525                          | 0.262                          | 0.932                          | 0.552                          | 0.344                          |
| IL-8           | 1.000                          | 0.638                          | 0.459                          | 0.075                          | 0.125                          | 0.560                          | 0.091                          | 0.223                          | 0.560                          | 0.237                          | 0.705                          | 0.303                          |
| IL-9           | 0.243                          | 0.638                          | 0.946                          | 0.111                          | 0.186                          | 0.491                          | 0.594                          | 0.368                          | 0.958                          | 0.220                          | 0.131                          | 0.039                          |
| IP-10          | 0.203                          | 0.019                          | 0.737                          | 0.223                          | 0.186                          | 0.427                          | 0.929                          | 0.958                          | 0.711                          | 0.035                          | 0.059                          | 0.134                          |
| MCP-1          | 0.034                          | 0.382                          | 0.201                          | 0.111                          | 0.368                          | 0.081                          | 0.790                          | 0.874                          | 0.634                          | 0.128                          | 0.345                          | 0.640                          |
| MIP-1 $\alpha$ | 0.111                          | 0.122                          | 0.106                          | 0.512                          | 0.090                          | 0.916                          | 0.477                          | 0.289                          | 0.634                          | 0.108                          | 0.131                          | 0.399                          |
| MIP-1 $\beta$  | 0.034                          | 0.545                          | 0.158                          | 0.031                          | 0.560                          | 0.958                          | 0.790                          | 0.791                          | 0.634                          | 0.272                          | 0.186                          | 0.092                          |
| PDGF-BB        | 0.339                          | 0.459                          | 0.638                          | 0.223                          | 0.050                          | 0.958                          | 0.722                          | 0.064                          | 0.874                          | 0.447                          | 0.023                          | 0.082                          |
| RANTES         | 0.034                          | 0.382                          | 0.638                          | 0.160                          | 0.223                          | 0.368                          | 0.657                          | 0.266                          | 0.634                          | 0.057                          | 0.008                          | 0.039                          |
| TNF- $\alpha$  | 0.202                          | 0.313                          | 0.840                          | 0.325                          | 0.101                          | 0.153                          | 0.894                          | 0.101                          | 0.368                          | 0.446                          | 0.186                          | 0.453                          |
| VEGF           | 0.457                          | 0.382                          | 0.637                          | 0.349                          | 0.427                          | 0.916                          | 0.790                          | 0.315                          | 0.672                          | 0.353                          | 0.089                          | 0.061                          |



**Supplementary Table 4.** Correlation analysis of CSF cytokines and neurotrophic factors concentrations with age, BMI or CHOP-INTEND of SMA1 patients at first (T0), fourth (T1, loading) and sixth (T2, maintenance) injection of Nusinersen.

| Analyte        | SMA1           |          |          |                |              |          |                |          |          |                |          |          |                |          |          |                |          |          |                |          |          |                |          |          |                |          |    |
|----------------|----------------|----------|----------|----------------|--------------|----------|----------------|----------|----------|----------------|----------|----------|----------------|----------|----------|----------------|----------|----------|----------------|----------|----------|----------------|----------|----------|----------------|----------|----|
|                | T0             |          |          |                |              |          |                |          |          | T1             |          |          |                |          |          |                |          |          | T2             |          |          |                |          |          |                |          |    |
|                | Age            |          |          | BMI            |              |          | CHOP           |          |          | Age            |          |          | BMI            |          |          | CHOP           |          |          | Age            |          |          | BMI            |          |          | CHOP           |          |    |
| <i>r</i>       | <i>p value</i> | <i>n</i> | <i>r</i> | <i>p value</i> | <i>n</i>     | <i>r</i> | <i>p value</i> | <i>n</i> | <i>r</i> | <i>p value</i> | <i>n</i> | <i>r</i> | <i>p value</i> | <i>n</i> | <i>r</i> | <i>p value</i> | <i>n</i> | <i>r</i> | <i>p value</i> | <i>n</i> | <i>r</i> | <i>p value</i> | <i>n</i> | <i>r</i> | <i>p value</i> | <i>n</i> |    |
| Basic FGF      | -0.029         | 0.909    | 18       | 0.147          | 0.560        | 18       | -0.136         | 0.591    | 18       | -0.431         | 0.095    | 16       | -0.070         | 0.837    | 11       | 0.202          | 0.489    | 14       | -0.430         | 0.096    | 16       | -0.286         | 0.321    | 14       | 0.255          | 0.340    | 16 |
| Eotaxin        | -0.156         | 0.537    | 18       | 0.309          | 0.213        | 18       | 0.164          | 0.516    | 18       | -0.054         | 0.841    | 16       | -0.445         | 0.170    | 11       | -0.180         | 0.538    | 14       | -0.383         | 0.143    | 16       | -0.165         | 0.572    | 14       | 0.389          | 0.137    | 16 |
| G-CSF          | -0.139         | 0.581    | 18       | 0.269          | 0.280        | 18       | 0.392          | 0.108    | 18       | -0.035         | 0.897    | 16       | 0.027          | 0.937    | 11       | 0.007          | 0.982    | 14       | -0.376         | 0.151    | 16       | 0.108          | 0.714    | 14       | 0.343          | 0.193    | 16 |
| GM-CSF         | 0.192          | 0.444    | 18       | 0.042          | 0.867        | 18       | 0.214          | 0.395    | 18       | 0.094          | 0.729    | 16       | 0.300          | 0.370    | 11       | 0.042          | 0.887    | 14       | 0.106          | 0.696    | 16       | 0.055          | 0.852    | 14       | -0.125         | 0.646    | 16 |
| IFN- $\gamma$  | -0.036         | 0.887    | 18       | 0.448          | 0.062        | 18       | 0.239          | 0.340    | 18       | 0.268          | 0.316    | 16       | 0.282          | 0.401    | 11       | -0.380         | 0.181    | 14       | -0.107         | 0.692    | 16       | 0.123          | 0.675    | 14       | 0.161          | 0.550    | 16 |
| IL-10          | 0.137          | 0.587    | 18       | -0.265         | 0.287        | 18       | 0.160          | 0.526    | 18       | 0.132          | 0.625    | 16       | -0.055         | 0.873    | 11       | 0.241          | 0.407    | 14       | 0.219          | 0.415    | 16       | -0.033         | 0.911    | 14       | -0.173         | 0.521    | 16 |
| IL-12(p70)     | 0.119          | 0.639    | 18       | -0.071         | 0.779        | 18       | 0.121          | 0.631    | 18       | -0.068         | 0.803    | 16       | 0.255          | 0.450    | 11       | 0.113          | 0.702    | 14       | 0.177          | 0.512    | 16       | 0.183          | 0.531    | 14       | -0.229         | 0.394    | 16 |
| IL-13          | 0.059          | 0.816    | 18       | 0.098          | 0.698        | 18       | 0.321          | 0.194    | 18       | 0.490          | 0.054    | 16       | 0.232          | 0.492    | 11       | -0.170         | 0.561    | 14       | 0.168          | 0.535    | 16       | -0.385         | 0.175    | 14       | -0.044         | 0.871    | 16 |
| IL-15          | 0.139          | 0.581    | 18       | -0.024         | 0.926        | 18       | 0.085          | 0.737    | 18       | 0.318          | 0.231    | 16       | -0.200         | 0.555    | 11       | -0.031         | 0.916    | 14       | 0.409          | 0.116    | 16       | -0.288         | 0.318    | 14       | -0.138         | 0.609    | 16 |
| IL-17          | -0.007         | 0.977    | 18       | 0.347          | 0.158        | 18       | 0.179          | 0.477    | 18       | 0.041          | 0.880    | 16       | 0.465          | 0.150    | 11       | -0.027         | 0.928    | 14       | -0.306         | 0.250    | 16       | 0.152          | 0.603    | 14       | 0.208          | 0.440    | 16 |
| IL-1 $\beta$   | 0.042          | 0.867    | 18       | 0.017          | 0.948        | 18       | -0.092         | 0.717    | 18       | -0.223         | 0.407    | 16       | -0.093         | 0.785    | 11       | -0.059         | 0.842    | 14       | -0.064         | 0.813    | 16       | 0.339          | 0.236    | 14       | -0.059         | 0.828    | 16 |
| IL-1ra         | 0.110          | 0.663    | 18       | 0.023          | 0.929        | 18       | 0.220          | 0.381    | 18       | 0.247          | 0.356    | 16       | -0.050         | 0.884    | 11       | -0.048         | 0.872    | 14       | 0.041          | 0.880    | 16       | -0.240         | 0.409    | 14       | -0.019         | 0.944    | 16 |
| IL-2           | -0.002         | 0.994    | 18       | -0.160         | 0.526        | 18       | 0.288          | 0.246    | 18       | 0.141          | 0.602    | 16       | 0.050          | 0.884    | 11       | -0.008         | 0.979    | 14       | 0.069          | 0.799    | 16       | -0.051         | 0.863    | 14       | -0.018         | 0.946    | 16 |
| IL-4           | -0.107         | 0.671    | 18       | 0.118          | 0.642        | 18       | 0.273          | 0.273    | 18       | -0.119         | 0.660    | 16       | -0.041         | 0.905    | 11       | -0.033         | 0.910    | 14       | -0.049         | 0.858    | 16       | 0.136          | 0.642    | 14       | -0.119         | 0.661    | 16 |
| IL-5           | 0.228          | 0.363    | 18       | -0.143         | 0.570        | 18       | 0.057          | 0.822    | 18       | 0.218          | 0.418    | 16       | -0.118         | 0.729    | 11       | 0.002          | 0.994    | 14       | 0.294          | 0.269    | 16       | -0.015         | 0.958    | 14       | -0.191         | 0.478    | 16 |
| IL-6           | 0.214          | 0.395    | 18       | -0.090         | 0.723        | 18       | 0.161          | 0.524    | 18       | 0.562          | 0.024    | 16       | 0.018          | 0.958    | 11       | -0.064         | 0.828    | 14       | 0.241          | 0.368    | 16       | -0.257         | 0.375    | 14       | -0.010         | 0.970    | 16 |
| IL-7           | -0.330         | 0.181    | 18       | 0.194          | 0.441        | 18       | 0.158          | 0.530    | 18       | -0.091         | 0.737    | 16       | -0.018         | 0.958    | 11       | -0.130         | 0.657    | 14       | -0.193         | 0.474    | 16       | -0.117         | 0.690    | 14       | 0.127          | 0.639    | 16 |
| IL-8           | -0.294         | 0.236    | 18       | 0.352          | 0.152        | 18       | -0.179         | 0.476    | 18       | 0.041          | 0.880    | 16       | -0.455         | 0.160    | 11       | -0.325         | 0.258    | 14       | 0.094          | 0.729    | 16       | 0.011          | 0.970    | 14       | 0.003          | 0.991    | 16 |
| IL-9           | 0.121          | 0.633    | 18       | 0.501          | 0.034        | 18       | 0.147          | 0.560    | 18       | -0.203         | 0.451    | 16       | 0.445          | 0.170    | 11       | 0.121          | 0.679    | 14       | 0.082          | 0.762    | 16       | -0.305         | 0.288    | 14       | -0.090         | 0.741    | 16 |
| IP-10          | -0.251         | 0.316    | 18       | 0.385          | 0.115        | 18       | 0.251          | 0.315    | 18       | -0.271         | 0.311    | 16       | 0.345          | 0.298    | 11       | 0.174          | 0.551    | 14       | -0.274         | 0.305    | 16       | -0.345         | 0.227    | 14       | 0.296          | 0.266    | 16 |
| MCP-1          | -0.251         | 0.316    | 18       | 0.674          | <b>0.002</b> | 18       | 0.272          | 0.275    | 18       | 0.144          | 0.594    | 16       | 0.518          | 0.102    | 11       | -0.475         | 0.086    | 14       | -0.126         | 0.641    | 16       | 0.130          | 0.659    | 14       | 0.166          | 0.538    | 16 |
| MIP-1 $\alpha$ | -0.337         | 0.171    | 18       | 0.311          | 0.210        | 18       | 0.349          | 0.156    | 18       | -0.237         | 0.377    | 16       | 0.227          | 0.502    | 11       | 0.092          | 0.755    | 14       | -0.673         | 0.004    | 16       | 0.000          | 1.000    | 14       | 0.575          | 0.020    | 16 |
| MIP-1 $\beta$  | -0.127         | 0.616    | 18       | 0.717          | <b>0.001</b> | 18       | 0.251          | 0.315    | 18       | -0.338         | 0.200    | 16       | 0.418          | 0.201    | 11       | 0.035          | 0.905    | 14       | -0.553         | 0.026    | 16       | -0.042         | 0.887    | 14       | 0.542          | 0.030    | 16 |
| PDGF-BB        | -0.194         | 0.440    | 18       | 0.264          | 0.289        | 18       | 0.023          | 0.928    | 18       | -0.276         | 0.300    | 16       | 0.145          | 0.670    | 11       | 0.053          | 0.857    | 14       | -0.206         | 0.444    | 16       | 0.266          | 0.358    | 14       | 0.034          | 0.901    | 16 |
| RANTES         | -0.186         | 0.460    | 18       | 0.680          | <b>0.002</b> | 18       | 0.266          | 0.286    | 18       | -0.191         | 0.478    | 16       | 0.464          | 0.151    | 11       | 0.135          | 0.646    | 14       | 0.153          | 0.572    | 16       | -0.332         | 0.246    | 14       | 0.032          | 0.905    | 16 |
| TNF- $\alpha$  | -0.128         | 0.613    | 18       | 0.364          | 0.137        | 18       | 0.088          | 0.729    | 18       | -0.315         | 0.235    | 16       | 0.236          | 0.484    | 11       | -0.035         | 0.905    | 14       | -0.305         | 0.251    | 16       | 0.240          | 0.409    | 14       | 0.185          | 0.493    | 16 |
| VEGF           | 0.221          | 0.378    | 18       | 0.309          | 0.213        | 18       | 0.111          | 0.662    | 18       | 0.179          | 0.506    | 16       | 0.382          | 0.247    | 11       | 0.152          | 0.603    | 14       | 0.193          | 0.474    | 16       | -0.002         | 0.994    | 14       | 0.026          | 0.924    | 16 |

Statistical analyses were performed by Spearman's correlations. *p* values that remain significant after correction with Benjamini-Hochberg multiple comparisons are shown in bold (see main text for *p* values after Benjamini-Hochberg correction).

**Supplementary Table 5.** Correlation analysis between CSF cytokines and neurotrophic factors concentrations and age, BMI or HFMSE of SMA2 patients at first (T0), fourth (T1, loading) and sixth (T2, maintenance) injection of Nusinersen.

| Analyte    | SMA2     |                |          |          |                |          |          |                |          |          |                |          |          |                |          |          |                |          |          |                |          |          |                |          |          |                |          |
|------------|----------|----------------|----------|----------|----------------|----------|----------|----------------|----------|----------|----------------|----------|----------|----------------|----------|----------|----------------|----------|----------|----------------|----------|----------|----------------|----------|----------|----------------|----------|
|            | T0       |                |          |          |                |          |          |                |          | T1       |                |          |          |                |          |          |                |          | T2       |                |          |          |                |          |          |                |          |
|            | Age      |                |          | BMI      |                |          | HFMSE    |                |          | Age      |                |          | BMI      |                |          | HFMSE    |                |          | Age      |                |          | BMI      |                |          | HFMSE    |                |          |
|            | <i>r</i> | <i>p value</i> | <i>n</i> | <i>r</i> | <i>p value</i> | <i>n</i> | <i>r</i> | <i>p value</i> | <i>n</i> | <i>r</i> | <i>p value</i> | <i>n</i> | <i>r</i> | <i>p value</i> | <i>n</i> | <i>r</i> | <i>p value</i> | <i>n</i> | <i>r</i> | <i>p value</i> | <i>n</i> | <i>r</i> | <i>p value</i> | <i>n</i> | <i>r</i> | <i>p value</i> | <i>n</i> |
| Basic FGF  | -0.099   | 0.686          | 19       | -0.432   | 0.083          | 17       | -0.190   | 0.437          | 19       | 0.702    | 0.016          | 11       | 0.200    | 0.747          | 5        | -0.624   | 0.134          | 7        | 0.152    | 0.546          | 18       | -0.089   | 0.762          | 14       | -0.196   | 0.451          | 17       |
| Eotaxin    | 0.338    | 0.157          | 19       | -0.200   | 0.442          | 17       | -0.271   | 0.262          | 19       | 0.323    | 0.332          | 11       | -0.100   | 0.873          | 5        | -0.595   | 0.159          | 7        | 0.171    | 0.496          | 18       | 0.092    | 0.753          | 14       | -0.266   | 0.302          | 17       |
| G-CSF      | 0.076    | 0.756          | 19       | -0.334   | 0.191          | 17       | -0.224   | 0.357          | 19       | -0.173   | 0.611          | 11       | -0.700   | 0.188          | 5        | -0.180   | 0.699          | 7        | -0.190   | 0.450          | 18       | 0.196    | 0.503          | 14       | 0.016    | 0.952          | 17       |
| GM-CSF     | 0.002    | 0.994          | 19       | -0.434   | 0.082          | 17       | -0.094   | 0.701          | 19       | 0.128    | 0.707          | 11       | -0.359   | 0.553          | 5        | -0.573   | 0.179          | 7        | 0.052    | 0.838          | 18       | 0.135    | 0.647          | 14       | -0.194   | 0.455          | 17       |
| IFN-γ      | -0.125   | 0.611          | 19       | -0.224   | 0.387          | 17       | -0.167   | 0.493          | 19       | -0.064   | 0.852          | 11       | -0.564   | 0.322          | 5        | -0.200   | 0.667          | 7        | -0.214   | 0.394          | 18       | 0.187    | 0.523          | 14       | 0.020    | 0.940          | 17       |
| IL-10      | -0.082   | 0.738          | 19       | -0.274   | 0.288          | 17       | -0.398   | 0.092          | 19       | 0.041    | 0.904          | 11       | -0.462   | 0.434          | 5        | -0.382   | 0.398          | 7        | 0.155    | 0.539          | 18       | 0.258    | 0.373          | 14       | -0.276   | 0.283          | 17       |
| IL-12(p70) | 0.049    | 0.844          | 19       | 0.101    | 0.699          | 17       | -0.188   | 0.440          | 19       | 0.567    | 0.069          | 11       | 0.200    | 0.747          | 5        | -0.432   | 0.333          | 7        | 0.215    | 0.391          | 18       | 0.024    | 0.935          | 14       | -0.325   | 0.203          | 17       |
| IL-13      | 0.063    | 0.798          | 19       | -0.514   | 0.035          | 17       | -0.146   | 0.550          | 19       | 0.091    | 0.790          | 11       | -0.500   | 0.391          | 5        | -0.739   | 0.058          | 7        | 0.073    | 0.772          | 18       | 0.433    | 0.122          | 14       | -0.054   | 0.837          | 17       |
| IL-15      | -0.130   | 0.596          | 19       | -0.373   | 0.141          | 17       | -0.270   | 0.263          | 19       | -0.337   | 0.311          | 11       | -0.600   | 0.285          | 5        | -0.090   | 0.848          | 7        | 0.098    | 0.699          | 18       | 0.363    | 0.203          | 14       | -0.317   | 0.215          | 17       |
| IL-17      | 0.103    | 0.674          | 19       | -0.403   | 0.109          | 17       | -0.284   | 0.239          | 19       | 0.142    | 0.678          | 11       | -0.359   | 0.553          | 5        | -0.355   | 0.435          | 7        | 0.073    | 0.772          | 18       | 0.029    | 0.923          | 14       | -0.220   | 0.396          | 17       |
| IL-1β      | 0.191    | 0.433          | 19       | -0.026   | 0.921          | 17       | -0.146   | 0.550          | 19       | 0.087    | 0.799          | 11       | -0.103   | 0.870          | 5        | 0.436    | 0.328          | 7        | 0.147    | 0.560          | 18       | 0.172    | 0.556          | 14       | -0.381   | 0.131          | 17       |
| IL-1ra     | 0.090    | 0.713          | 19       | -0.343   | 0.178          | 17       | -0.224   | 0.357          | 19       | -0.328   | 0.325          | 11       | -0.700   | 0.188          | 5        | -0.018   | 0.969          | 7        | -0.060   | 0.813          | 18       | 0.341    | 0.233          | 14       | -0.108   | 0.680          | 17       |
| IL-2       | -0.095   | 0.698          | 19       | -0.237   | 0.360          | 17       | -0.204   | 0.403          | 19       | 0.082    | 0.810          | 11       | -0.300   | 0.624          | 5        | -0.342   | 0.452          | 7        | 0.029    | 0.908          | 18       | 0.077    | 0.794          | 14       | -0.175   | 0.501          | 17       |
| IL-4       | 0.234    | 0.336          | 19       | -0.331   | 0.195          | 17       | -0.241   | 0.321          | 19       | 0.158    | 0.644          | 11       | -0.900   | 0.037          | 5        | -0.685   | 0.090          | 7        | 0.133    | 0.599          | 18       | -0.204   | 0.483          | 14       | -0.141   | 0.590          | 17       |
| IL-5       | 0.018    | 0.943          | 19       | -0.199   | 0.445          | 17       | -0.213   | 0.382          | 19       | -0.119   | 0.728          | 11       | -0.462   | 0.434          | 5        | -0.218   | 0.638          | 7        | 0.109    | 0.666          | 18       | 0.358    | 0.208          | 14       | -0.250   | 0.332          | 17       |
| IL-6       | 0.075    | 0.762          | 19       | -0.306   | 0.232          | 17       | -0.234   | 0.334          | 19       | 0.155    | 0.649          | 11       | 0.000    | 1.000          | 5        | -0.126   | 0.788          | 7        | 0.159    | 0.529          | 18       | -0.033   | 0.911          | 14       | -0.098   | 0.708          | 17       |
| IL-7       | 0.192    | 0.432          | 19       | 0.280    | 0.277          | 17       | -0.034   | 0.889          | 19       | 0.143    | 0.674          | 11       | -0.200   | 0.747          | 5        | -0.036   | 0.938          | 7        | -0.220   | 0.380          | 18       | -0.576   | 0.031          | 14       | 0.159    | 0.543          | 17       |
| IL-8       | 0.198    | 0.416          | 19       | 0.010    | 0.970          | 17       | -0.122   | 0.617          | 19       | -0.050   | 0.884          | 11       | -0.400   | 0.505          | 5        | -0.054   | 0.908          | 7        | -0.118   | 0.642          | 18       | 0.204    | 0.483          | 14       | -0.139   | 0.595          | 17       |
| IL-9       | 0.296    | 0.219          | 19       | -0.259   | 0.316          | 17       | -0.401   | 0.089          | 19       | 0.050    | 0.884          | 11       | -0.500   | 0.391          | 5        | -0.414   | 0.355          | 7        | 0.176    | 0.486          | 18       | 0.260    | 0.370          | 14       | -0.231   | 0.372          | 17       |
| IP-10      | 0.526    | 0.021          | 19       | -0.059   | 0.823          | 17       | -0.285   | 0.236          | 19       | 0.383    | 0.245          | 11       | 0.100    | 0.873          | 5        | -0.324   | 0.478          | 7        | 0.164    | 0.515          | 18       | 0.138    | 0.637          | 14       | -0.238   | 0.357          | 17       |
| MCP-1      | 0.225    | 0.355          | 19       | 0.027    | 0.918          | 17       | -0.063   | 0.799          | 19       | 0.091    | 0.790          | 11       | -0.100   | 0.873          | 5        | -0.270   | 0.558          | 7        | -0.093   | 0.714          | 18       | 0.042    | 0.887          | 14       | -0.028   | 0.914          | 17       |
| MIP-1α     | 0.272    | 0.259          | 19       | -0.177   | 0.498          | 17       | -0.245   | 0.313          | 19       | 0.187    | 0.582          | 11       | -0.400   | 0.505          | 5        | -0.324   | 0.478          | 7        | -0.117   | 0.645          | 18       | 0.165    | 0.573          | 14       | 0.049    | 0.852          | 17       |
| MIP-1β     | 0.218    | 0.371          | 19       | -0.419   | 0.094          | 17       | -0.322   | 0.179          | 19       | -0.018   | 0.958          | 11       | -0.200   | 0.747          | 5        | -0.162   | 0.728          | 7        | 0.068    | 0.788          | 18       | 0.244    | 0.401          | 14       | -0.253   | 0.327          | 17       |
| PDGF-BB    | -0.040   | 0.872          | 19       | -0.184   | 0.480          | 17       | -0.136   | 0.578          | 19       | 0.475    | 0.140          | 11       | 0.600    | 0.285          | 5        | -0.577   | 0.175          | 7        | 0.662    | 0.003          | 18       | 0.388    | 0.171          | 14       | -0.720   | 0.001          | 17       |
| RANTES     | 0.440    | 0.059          | 19       | -0.076   | 0.772          | 17       | -0.466   | 0.044          | 19       | 0.364    | 0.270          | 11       | 0.700    | 0.188          | 5        | -0.396   | 0.379          | 7        | 0.285    | 0.252          | 18       | 0.121    | 0.681          | 14       | -0.250   | 0.332          | 17       |
| TNF-α      | 0.326    | 0.173          | 19       | -0.041   | 0.877          | 17       | -0.363   | 0.127          | 19       | 0.269    | 0.424          | 11       | -0.200   | 0.747          | 5        | -0.270   | 0.558          | 7        | 0.248    | 0.320          | 18       | -0.161   | 0.583          | 14       | -0.255   | 0.324          | 17       |
| VEGF       | 0.134    | 0.584          | 19       | -0.426   | 0.088          | 17       | -0.213   | 0.381          | 19       | -0.032   | 0.926          | 11       | 0.200    | 0.747          | 5        | -0.180   | 0.699          | 7        | 0.232    | 0.354          | 18       | 0.292    | 0.311          | 14       | -0.431   | 0.084          | 17       |

Statistical analyses were performed by Spearman's correlations. All *p* values are not significant after correction with Benjamini-Hochberg multiple comparisons.

**Supplementary Table 6.** Correlation analysis between CSF cytokines and neurotrophic factors concentrations and age, BMI or HFMSE of SMA3 patients at first (T0), fourth (T1, loading) and sixth (T2, maintenance) injection of Nusinersen.

| SMA3       |        |         |    |        |         |    |        |         |    |        |         |    |        |         |    |        |         |   |        |         |    |        |         |    |        |         |    |
|------------|--------|---------|----|--------|---------|----|--------|---------|----|--------|---------|----|--------|---------|----|--------|---------|---|--------|---------|----|--------|---------|----|--------|---------|----|
| Analyte    | T0     |         |    |        |         |    |        |         |    | T1     |         |    |        |         |    |        |         |   | T2     |         |    |        |         |    |        |         |    |
|            | Age    |         |    | BMI    |         |    | HFMSE  |         |    | Age    |         |    | BMI    |         |    | HFMSE  |         |   | Age    |         |    | BMI    |         |    | HFMSE  |         |    |
|            | r      | p value | n  | r      | p value | n  | r      | p value | n  | r      | p value | n  | r      | p value | n  | r      | p value | n | r      | p value | n  | r      | p value | n  | r      | p value | n  |
| Basic FGF  | -0.065 | 0.849   | 11 | -0.172 | 0.634   | 10 | 0.224  | 0.507   | 11 | 0.323  | 0.333   | 11 | 0.078  | 0.831   | 10 | 0.090  | 0.818   | 9 | 0.221  | 0.514   | 11 | -0.005 | 0.989   | 11 | 0.234  | 0.488   | 11 |
| Eotaxin    | 0.027  | 0.936   | 11 | -0.012 | 0.973   | 10 | 0.272  | 0.419   | 11 | 0.538  | 0.088   | 11 | -0.116 | 0.751   | 10 | -0.227 | 0.557   | 9 | 0.027  | 0.937   | 11 | -0.327 | 0.326   | 11 | 0.009  | 0.979   | 11 |
| G-CSF      | -0.191 | 0.574   | 11 | 0.042  | 0.907   | 10 | 0.141  | 0.679   | 11 | 0.087  | 0.800   | 11 | -0.220 | 0.542   | 10 | -0.148 | 0.705   | 9 | -0.245 | 0.467   | 11 | -0.009 | 0.979   | 11 | -0.227 | 0.502   | 11 |
| GM-CSF     | -0.489 | 0.127   | 11 | -0.006 | 0.987   | 10 | 0.145  | 0.672   | 11 | -0.487 | 0.128   | 11 | 0.043  | 0.907   | 10 | 0.441  | 0.235   | 9 | -0.690 | 0.019   | 11 | -0.192 | 0.572   | 11 | 0.142  | 0.678   | 11 |
| IFN-γ      | -0.309 | 0.355   | 11 | 0.127  | 0.726   | 10 | -0.005 | 0.989   | 11 | -0.292 | 0.384   | 11 | -0.249 | 0.487   | 10 | -0.361 | 0.339   | 9 | -0.484 | 0.131   | 11 | -0.237 | 0.482   | 11 | -0.237 | 0.482   | 11 |
| IL-10      | -0.482 | 0.133   | 11 | 0.139  | 0.701   | 10 | 0.214  | 0.527   | 11 | -0.178 | 0.600   | 11 | 0.159  | 0.662   | 10 | 0.239  | 0.535   | 9 | -0.137 | 0.689   | 11 | -0.059 | 0.863   | 11 | 0.255  | 0.449   | 11 |
| IL-12(p70) | -0.333 | 0.316   | 11 | -0.372 | 0.290   | 10 | 0.735  | 0.010   | 11 | 0.166  | 0.627   | 11 | 0.609  | 0.061   | 10 | 0.291  | 0.448   | 9 | 0.105  | 0.759   | 11 | -0.100 | 0.769   | 11 | 0.333  | 0.318   | 11 |
| IL-13      | -0.082 | 0.811   | 11 | 0.067  | 0.855   | 10 | 0.443  | 0.172   | 11 | 0.091  | 0.790   | 11 | 0.188  | 0.603   | 10 | -0.042 | 0.915   | 9 | -0.227 | 0.502   | 11 | 0.173  | 0.612   | 11 | -0.345 | 0.298   | 11 |
| IL-15      | -0.473 | 0.142   | 11 | -0.018 | 0.960   | 10 | -0.118 | 0.729   | 11 | -0.018 | 0.958   | 11 | 0.200  | 0.580   | 10 | -0.008 | 0.983   | 9 | -0.323 | 0.332   | 11 | 0.059  | 0.863   | 11 | -0.014 | 0.968   | 11 |
| IL-17      | -0.178 | 0.600   | 11 | 0.470  | 0.171   | 10 | -0.085 | 0.805   | 11 | 0.506  | 0.112   | 11 | 0.411  | 0.238   | 10 | -0.056 | 0.887   | 9 | -0.464 | 0.150   | 11 | -0.414 | 0.206   | 11 | 0.101  | 0.767   | 11 |
| IL-1β      | 0.191  | 0.573   | 11 | -0.100 | 0.783   | 10 | 0.316  | 0.344   | 11 | 0.283  | 0.399   | 11 | 0.285  | 0.424   | 10 | 0.000  | 1.000   | 9 | 0.259  | 0.442   | 11 | -0.057 | 0.867   | 11 | -0.144 | 0.673   | 11 |
| IL-1ra     | -0.018 | 0.958   | 11 | 0.681  | 0.030   | 10 | -0.187 | 0.581   | 11 | -0.096 | 0.779   | 11 | 0.427  | 0.219   | 10 | -0.325 | 0.394   | 9 | -0.118 | 0.729   | 11 | 0.173  | 0.612   | 11 | -0.018 | 0.958   | 11 |
| IL-2       | -0.455 | 0.160   | 11 | 0.018  | 0.960   | 10 | -0.178 | 0.601   | 11 | -0.111 | 0.745   | 11 | 0.106  | 0.772   | 10 | 0.217  | 0.576   | 9 | -0.351 | 0.290   | 11 | -0.164 | 0.630   | 11 | 0.164  | 0.630   | 11 |
| IL-4       | 0.187  | 0.581   | 11 | 0.073  | 0.841   | 10 | 0.391  | 0.234   | 11 | -0.151 | 0.658   | 11 | 0.073  | 0.841   | 10 | -0.080 | 0.838   | 9 | 0.352  | 0.289   | 11 | -0.009 | 0.979   | 11 | 0.041  | 0.905   | 11 |
| IL-5       | -0.509 | 0.110   | 11 | -0.103 | 0.777   | 10 | -0.118 | 0.729   | 11 | -0.209 | 0.537   | 11 | 0.164  | 0.651   | 10 | 0.100  | 0.797   | 9 | -0.127 | 0.709   | 11 | 0.127  | 0.709   | 11 | 0.027  | 0.937   | 11 |
| IL-6       | 0.191  | 0.574   | 11 | 0.188  | 0.603   | 10 | 0.191  | 0.573   | 11 | 0.137  | 0.689   | 11 | 0.097  | 0.789   | 10 | 0.201  | 0.604   | 9 | -0.064 | 0.853   | 11 | 0.009  | 0.979   | 11 | -0.255 | 0.450   | 11 |
| IL-7       | 0.110  | 0.748   | 11 | 0.036  | 0.920   | 10 | 0.236  | 0.485   | 11 | 0.282  | 0.401   | 11 | 0.138  | 0.704   | 10 | 0.041  | 0.916   | 9 | 0.200  | 0.555   | 11 | -0.209 | 0.537   | 11 | -0.135 | 0.692   | 11 |
| IL-8       | 0.309  | 0.355   | 11 | 0.345  | 0.328   | 10 | -0.369 | 0.264   | 11 | 0.082  | 0.811   | 11 | -0.248 | 0.489   | 10 | -0.460 | 0.213   | 9 | 0.027  | 0.937   | 11 | -0.291 | 0.385   | 11 | -0.418 | 0.201   | 11 |
| IL-9       | -0.073 | 0.831   | 11 | 0.576  | 0.082   | 10 | -0.050 | 0.883   | 11 | 0.036  | 0.915   | 11 | 0.285  | 0.425   | 10 | -0.025 | 0.949   | 9 | -0.236 | 0.484   | 11 | -0.091 | 0.790   | 11 | -0.091 | 0.790   | 11 |
| IP-10      | 0.209  | 0.537   | 11 | -0.176 | 0.627   | 10 | 0.433  | 0.184   | 11 | 0.418  | 0.201   | 11 | -0.224 | 0.533   | 10 | -0.276 | 0.472   | 9 | -0.145 | 0.670   | 11 | -0.145 | 0.670   | 11 | -0.400 | 0.223   | 11 |
| MCP-1      | -0.027 | 0.937   | 11 | -0.261 | 0.467   | 10 | 0.442  | 0.174   | 11 | -0.018 | 0.958   | 11 | -0.261 | 0.467   | 10 | -0.561 | 0.116   | 9 | -0.318 | 0.340   | 11 | -0.264 | 0.433   | 11 | -0.473 | 0.142   | 11 |
| MIP-1α     | 0.329  | 0.324   | 11 | -0.116 | 0.750   | 10 | 0.547  | 0.082   | 11 | 0.524  | 0.098   | 11 | -0.286 | 0.424   | 10 | -0.248 | 0.520   | 9 | 0.137  | 0.688   | 11 | -0.169 | 0.619   | 11 | -0.183 | 0.591   | 11 |
| MIP-1β     | -0.009 | 0.979   | 11 | 0.309  | 0.385   | 10 | -0.205 | 0.545   | 11 | 0.355  | 0.285   | 11 | 0.079  | 0.829   | 10 | -0.594 | 0.092   | 9 | 0.018  | 0.958   | 11 | 0.100  | 0.770   | 11 | -0.436 | 0.180   | 11 |
| PDGF-BB    | -0.401 | 0.222   | 11 | -0.200 | 0.580   | 10 | -0.142 | 0.678   | 11 | 0.210  | 0.536   | 11 | 0.225  | 0.532   | 10 | 0.033  | 0.932   | 9 | 0.227  | 0.502   | 11 | 0.182  | 0.593   | 11 | 0.336  | 0.312   | 11 |
| RANTES     | -0.027 | 0.937   | 11 | 0.358  | 0.310   | 10 | -0.392 | 0.233   | 11 | 0.105  | 0.758   | 11 | 0.275  | 0.441   | 10 | -0.038 | 0.923   | 9 | -0.145 | 0.670   | 11 | -0.018 | 0.958   | 11 | -0.273 | 0.417   | 11 |
| TNF-α      | 0.100  | 0.769   | 11 | -0.012 | 0.973   | 10 | 0.419  | 0.200   | 11 | 0.530  | 0.094   | 11 | 0.231  | 0.521   | 10 | 0.371  | 0.325   | 9 | 0.064  | 0.852   | 11 | -0.279 | 0.407   | 11 | 0.068  | 0.841   | 11 |
| VEGF       | -0.336 | 0.312   | 11 | 0.067  | 0.855   | 10 | 0.123  | 0.719   | 11 | -0.018 | 0.958   | 11 | 0.139  | 0.701   | 10 | -0.151 | 0.699   | 9 | -0.096 | 0.780   | 11 | 0.059  | 0.863   | 11 | 0.178  | 0.601   | 11 |

Statistical analyses were performed by Spearman's correlations. All *p* values are not significant after correction with Benjamini-Hochberg multiple comparisons.

**Supplementary Table 7.** CSF cytokines and neurotrophic factors levels (expressed as pg/ml) at T0 compared with T1 or T2 within each SMA1, SMA2 or SMA3 groups.

| Analyte    | SMA1                     |                       |                      |          |          | SMA2                     |                       |                     |          |          | SMA3                     |                      |                      |          |          |
|------------|--------------------------|-----------------------|----------------------|----------|----------|--------------------------|-----------------------|---------------------|----------|----------|--------------------------|----------------------|----------------------|----------|----------|
|            | T0 (n=18)                | T1 (n=16)             | T2 (n=16)            | T0 vs T1 | T0 vs T2 | T0 (n=19)                | T1 (n=11)             | T2 (n=18)           | T0 vs T1 | T0 vs T2 | T0 (n=11)                | T1 (n=11)            | T2 (n=11)            | T0 vs T1 | T0 vs T2 |
|            | Median [Min;Max] (pg/ml) |                       |                      | p value  |          | Median [Min;Max] (pg/ml) |                       |                     | p value  |          | Median [Min;Max] (pg/ml) |                      |                      | p value  |          |
| Basic FGF  | 3.15[1.41;8.55]          | 2.54[1.41;8.96]       | 2.97[2.1;4.51]       | 0.35     | 0.118    | 2.3[1.41;4.27]           | 2.3[2.3;4.2]          | 2.32[1.85;5.22]     | 0.892    | 0.374    | 2.3[1.41;7.05]           | 2.3[2.3;3.17]        | 2.3[0.21;3.53]       | 0.753    | 0.342    |
| Eotaxin    | 1.42[0.31;3.5]           | 0.97[0.5;3.28]        | 0.93[0.33;1.7]       | 0.125    | 0.017*   | 0.77[0.24;2.14]          | 0.97[0.54;1.7]        | 0.93[0.1;2.29]      | 0.646    | 0.239    | 0.54[0.36;1.5]           | 0.49[0.15;0.92]      | 0.42[0.16;1.51]      | 0.213    | 0.624    |
| G-CSF      | 29.79[9;70.33]           | 27.97[10.7;80.04]     | 26.61[7.62;65.31]    | 0.795    | 0.214    | 18.27[5.53;31.95]        | 29.65[10.02;47.98]    | 21.37[4.12;50.78]   | 0.026*   | 0.027*   | 11.28[6.93;24.18]        | 11.52[8.31;29.15]    | 11.52[4.65;23.82]    | 0.372    | 0.373    |
| GM-CSF     | 0.39[0.06;1.82]          | 0.44[0.04;1.68]       | 0.47[0.04;0.87]      | 0.733    | 0.334    | 0.29[0.11;0.78]          | 0.42[0.06;0.93]       | 0.27[0.06;0.9]      | 0.929    | 0.849    | 0.16[0.09;0.52]          | 0.25[0.05;0.36]      | 0.21[0.04;0.48]      | 0.414    | 0.504    |
| IFN-γ      | 3.93[0.71;9.09]          | 4.71[0.86;9.1]        | 4.43[1.02;7.01]      | 0.501    | 0.099    | 3.06[0.57;7.63]          | 4.02[1.08;9.81]       | 3.12[0.46;9.66]     | 0.075    | 0.222    | 1.88[0.61;4.43]          | 1.69[0.58;3.35]      | 1.79[0.67;4.75]      | 0.656    | 0.789    |
| IL-10      | 2.06[0.45;6.69]          | 2.09[0.79;4.27]       | 1.99[0.55;4.66]      | 0.736    | 0.111    | 1.26[0.48;2.04]          | 1.37[0.86;2.38]       | 0.95[0.48;1.99]     | 0.688    | 0.055    | 1.12[0.48;1.94]          | 0.97[0.48;1.55]      | 1.12[0.2;1.55]       | 0.259    | 0.964    |
| IL-12(p70) | 3[0.86;11.2]             | 2.76[0.86;6.61]       | 2.69[0.27;4.3]       | 0.211    | 0.035    | 1.75[0.95;2.83]          | 2.14[0.95;3.97]       | 1.81[0.27;3.71]     | 0.905    | 0.571    | 2.14[0.27;2.95]          | 1.6[0.27;2.14]       | 1.9[0.27;2.95]       | 0.332    | 0.767    |
| IL-13      | 0.9[0.17;5.89]           | 0.99[0.18;5.99]       | 1.28[0.24;3.62]      | 0.856    | 0.876    | 1[0.06;4.32]             | 1.98[1.17;3.85]       | 1.02[0.04;5.43]     | 0.328    | 0.743    | 1.39[0.21;1.91]          | 0.83[0.14;1.98]      | 0.74[0.22;1.44]      | 0.286    | 0.075    |
| IL-15      | 150.11[8.16;496.74]      | 143.6[4.89;455.81]    | 135.31[17.81;535.61] | 0.379    | 0.070    | 97.82[10.36;189.57]      | 86.45[24.14;200.22]   | 96.97[11.53;227.24] | 0.328    | 0.156    | 63.5[15.83;136.62]       | 39.52[0.69;121]      | 84.76[8.16;128.09]   | 0.13     | 0.373    |
| IL-17      | 1.55[0.44;3.21]          | 1.36[0.52;3.19]       | 0.96[0.52;2.07]      | 0.569    | 0.004**  | 0.72[0.44;1.72]          | 1.01[0.73;1.78]       | 0.74[0.37;2.06]     | 0.838    | 0.277    | 0.62[0.3;1.69]           | 0.44[0.43;0.66]      | 0.6[0.31;1.01]       | 0.068    | 0.646    |
| IL-1β      | 0.16[0.02;1.32]          | 0.12[0.03;1.52]       | 0.09[0.03;1.08]      | 0.155    | 0.055    | 0.08[0.02;0.28]          | 0.12[0.03;0.83]       | 0.1[0.03;0.2]       | 0.168    | 0.254    | 0.09[0.03;0.21]          | 0.03[0.03;0.12]      | 0.05[0.03;0.11]      | 0.197    | 0.293    |
| IL-1ra     | 173.13[25.52;818.72]     | 162.23[47.87;777.72]  | 177.02[41.91;328.29] | 0.795    | 0.255    | 133.74[19.67;323.33]     | 230.85[71.65;361.65]  | 121.39[17.7;312.99] | 0.059    | 0.711    | 120.33[30.69;156.32]     | 78.64[49.77;173.53]  | 76.17[8.06;113.27]   | 0.13     | 0.02*    |
| IL-2       | 1.7[0.17;5.64]           | 1.49[0.11;4.64]       | 1.6[0.05;3.24]       | 0.277    | 0.03*    | 0.77[0.11;1.77]          | 1.08[0.29;2.16]       | 0.6[0.02;2.1]       | 0.929    | 0.172    | 0.4[0.11;1.94]           | 0.34[0.02;1.02]      | 0.36[0.08;1.38]      | 0.091    | 0.384    |
| IL-4       | 0.25[0.03;0.73]          | 0.25[0.09;0.74]       | 0.21[0.12;0.41]      | 0.756    | 0.046*   | 0.17[0.05;0.44]          | 0.26[0.2;0.35]        | 0.18[0.03;0.43]     | 0.858    | 0.827    | 0.15[0.08;0.3]           | 0.14[0.08;0.24]      | 0.14[0.05;0.22]      | 0.442    | 0.182    |
| IL-5       | 73.96[7.04;362.81]       | 80.76[9.77;251.47]    | 69.34[12.23;273.88]  | 0.277    | 0.147    | 25.57[4.53;87.56]        | 50.27[13.2;111.04]    | 20.1[10.51;84.76]   | 0.213    | 0.831    | 14.62[2.22;53.14]        | 26.06[4.53;52.18]    | 28.02[2.48;54.09]    | 0.247    | 0.213    |
| IL-6       | 3.51[0.85;9.04]          | 5.04[0.89;7.44]       | 3.17[0.27;6.84]      | 0.756    | 0.234    | 2.18[0.63;5.37]          | 2.76[1.28;5.07]       | 2.73[0.27;40.78]    | 0.398    | 0.17     | 2.58[0.45;4.33]          | 1.79[0.93;3.07]      | 2.43[0.53;10.26]     | 0.373    | 0.964    |
| IL-7       | 2.15[0.52;7.71]          | 2.67[0.41;9.25]       | 1.37[0.41;4.7]       | 0.82     | 0.046*   | 1.44[0.84;4.46]          | 1.1[0.41;3.96]        | 1.51[0.84;5.89]     | 0.623    | 0.833    | 1.14[0.15;2.81]          | 1.1[0.63;2.68]       | 1.29[0.15;2.42]      | 0.678    | 0.858    |
| IL-8       | 47.67[20.24;120.04]      | 39.85[13.5;114.98]    | 39.32[10.75;90.14]   | 0.408    | 0.108    | 20.56[8.92;43.6]         | 28.14[13.79;89.48]    | 23.37[12.63;57.02]  | 0.012*   | 0.306    | 14.91[5.95;29.62]        | 15.39[6.79;21.7]     | 13.89[8.86;25]       | 0.789    | 1.000    |
| IL-9       | 9.09[2.23;128.48]        | 10.27[3.25;92.17]     | 7.25[2.68;32.78]     | 1.000    | 0.04*    | 5.1[2.61;90.72]          | 5.93[4.57;14.38]      | 4.57[2.17;89.44]    | 0.929    | 0.913    | 4.95[2.74;109.39]        | 3.56[2.74;6.33]      | 4.06[1.78;5.83]      | 0.085    | 0.114    |
| IP-10      | 255.71[20.47;1287.46]    | 185.81[62.33;569.24]  | 137.69[4.95;1614.77] | 0.178    | 0.147    | 141.45[3.47;955.22]      | 249.22[42.84;625.33]  | 165.4[5.86;1187.67] | 0.593    | 0.093    | 132.92[35.8;411.42]      | 151.96[2.99;412.55]  | 96.31[2.99;454.17]   | 0.858    | 0.858    |
| MCP-1      | 247.6[80.78;463.24]      | 280.55[148.02;454.25] | 237.36[41.43;470.74] | 0.108    | 0.534    | 168.61[95.19;477.39]     | 233.08[178.64;614.36] | 274.76[29.5;707.81] | 0.109    | 0.003**  | 155.63[90.35;217.4]      | 158.76[70.17;284.95] | 187.14[28.92;365.83] | 0.593    | 0.476    |
| MIP-1α     | 0.53[0.14;1.21]          | 0.49[0.1;1.48]        | 0.44[0.01;2.28]      | 0.187    | 0.224    | 0.25[0.06;0.48]          | 0.31[0.02;1.01]       | 0.4[0.02;0.84]      | 0.307    | 0.027*   | 0.24[0.1;0.51]           | 0.21[0.01;0.76]      | 0.21[0.1;0.7]        | 0.929    | 0.929    |
| MIP-1β     | 10.44[3.32;61.43]        | 12.3[2.15;49.67]      | 8.22[2.91;30.16]     | 0.338    | 0.301    | 4.97[1.85;45.1]          | 7.96[3.43;18.24]      | 8.63[1.01;43.08]    | 0.533    | 0.024*   | 4.34[2.35;52.63]         | 3.08[1.51;10.37]     | 3.75[1.01;10.85]     | 0.182    | 0.328    |
| PDGF-BB    | 20.14[4.28;89.97]        | 19.16[7.38;62.77]     | 16.65[3.9;69.23]     | 0.393    | 0.07     | 11.31[0.3;48.21]         | 12.01[0.3;23.45]      | 11.32[0.3;47.82]    | 0.332    | 1.000    | 8.29[0.3;36.29]          | 10.01[4.59;17.98]    | 9.02[3.09;17.98]     | 0.373    | 0.789    |
| RANTES     | 14.31[1.26;395.48]       | 7.63[2.22;307.87]     | 6.46[3.65;129.9]     | 0.437    | 0.087    | 4.77[1.83;284.35]        | 7.39[3.34;65.51]      | 3.37[0.74;262.16]   | 0.722    | 0.868    | 5.12[2.27;447.93]        | 4.39[2.27;23.03]     | 4.57[1.15;11.36]     | 0.213    | 0.286    |
| TNF-α      | 6.05[2.56;18]            | 5.1[2.74;25.23]       | 3.63[2.19;8.34]      | 0.796    | 0.010*   | 3.37[2.19;11.2]          | 4.69[2.47;6.26]       | 3.9[2.28;18.28]     | 0.374    | 0.379    | 3.64[1.63;8.06]          | 2.19[1.53;4.52]      | 2.76[1.82;5.22]      | 0.091    | 0.384    |
| VEGF       | 124.11[2.37;370.44]      | 105.66[2.25;299.99]   | 99.38[8.52;347.51]   | 0.795    | 0.026*   | 69.28[2.37;128.92]       | 90.03[11.13;185.62]   | 71.88[4.29;239.05]  | 0.476    | 0.239    | 64.74[2.37;120]          | 67.23[2.37;103.93]   | 36.45[2.37;125.36]   | 0.247    | 0.959    |

Values are expressed as median (min; max). Statistical analyses were performed by non-parametric Wilcoxon matched-pairs signed ranks. Significant *p* values are also marked with asterisks (\* *p*<0.05, \*\**p*<0.01).

**Supplementary Table 8.** Comparisons of cytokines and neurotrophic factors levels between subjects that are responsive and not responsive to Nusinersen within each SMA type and treatment group. Uncorrected *p* values obtained by Mann-Whitney test are reported. All *p* values are not significant after correction with Benjamini-Hochberg multiple comparisons.

| Analyte        | SMA1                                        |       |       | SMA2                                        |       |       | SMA3                                        |       |       |
|----------------|---------------------------------------------|-------|-------|---------------------------------------------|-------|-------|---------------------------------------------|-------|-------|
|                | T0                                          | T1    | T2    | T0                                          | T1    | T2    | T0                                          | T1    | T2    |
|                | <i>Responder vs Non responder (p value)</i> |       |       | <i>Responder vs Non responder (p value)</i> |       |       | <i>Responder vs Non responder (p value)</i> |       |       |
| Basic FGF      | 0.476                                       | 0.406 | 0.235 | 0.445                                       | 0.256 | 0.642 | 0.468                                       | 0.198 | 0.905 |
| Eotaxin        | 0.929                                       | 0.633 | 0.265 | 0.364                                       | 0.131 | 0.248 | 0.637                                       | 0.478 | 0.239 |
| G-CSF          | 0.722                                       | 0.560 | 0.125 | 0.836                                       | 0.571 | 0.424 | 0.480                                       | 0.193 | 0.059 |
| GM-CSF         | 0.182                                       | 0.672 | 0.072 | 0.679                                       | 0.924 | 0.964 | 0.469                                       | 0.906 | 0.193 |
| IFN- $\gamma$  | 0.689                                       | 0.874 | 0.397 | 0.483                                       | 0.570 | 0.248 | 0.814                                       | 0.194 | 0.033 |
| IL-10          | 0.657                                       | 0.958 | 0.314 | 0.508                                       | 0.296 | 0.755 | 0.637                                       | 0.236 | 0.345 |
| IL-12(p70)     | 0.374                                       | 0.874 | 0.168 | 0.967                                       | 0.251 | 0.755 | 0.407                                       | 0.474 | 0.723 |
| IL-13          | 0.423                                       | 0.138 | 0.186 | 0.591                                       | 0.850 | 0.965 | 0.555                                       | 0.637 | 0.034 |
| IL-15          | 0.859                                       | 0.634 | 0.266 | 0.563                                       | 0.705 | 0.790 | 0.480                                       | 0.814 | 0.637 |
| IL-17          | 0.929                                       | 0.874 | 0.313 | 0.771                                       | 0.394 | 0.594 | 0.193                                       | 0.547 | 0.233 |
| IL-1 $\beta$   | 1.000                                       | 0.788 | 0.628 | 0.560                                       | 0.154 | 0.621 | 0.137                                       | 0.198 | 0.456 |
| IL-1ra         | 0.722                                       | 0.711 | 0.458 | 0.869                                       | 0.850 | 0.424 | 0.408                                       | 0.407 | 0.099 |
| IL-2           | 0.790                                       | 1.000 | 0.367 | 0.649                                       | 0.394 | 0.789 | 0.346                                       | 0.631 | 0.345 |
| IL-4           | 0.859                                       | 0.633 | 0.596 | 0.534                                       | 1.000 | 0.858 | 0.097                                       | 0.813 | 0.813 |
| IL-5           | 0.859                                       | 0.958 | 0.223 | 0.772                                       | 0.507 | 0.722 | 0.239                                       | 0.637 | 0.814 |
| IL-6           | 0.328                                       | 0.266 | 0.958 | 0.741                                       | 0.450 | 0.477 | 0.814                                       | 0.478 | 0.034 |
| IL-7           | 0.964                                       | 0.340 | 0.749 | 0.644                                       | 0.843 | 0.323 | 0.155                                       | 0.083 | 0.904 |
| IL-8           | 0.155                                       | 0.791 | 0.958 | 0.509                                       | 0.450 | 0.477 | 0.814                                       | 0.346 | 0.099 |
| IL-9           | 0.657                                       | 0.874 | 0.634 | 0.509                                       | 0.257 | 0.625 | 0.555                                       | 0.637 | 0.239 |
| IP-10          | 0.929                                       | 0.874 | 0.125 | 0.048                                       | 0.089 | 0.248 | 0.637                                       | 0.480 | 0.099 |
| MCP-1          | 0.594                                       | 0.874 | 0.368 | 0.620                                       | 0.345 | 0.424 | 0.157                                       | 1.000 | 0.034 |
| MIP-1 $\alpha$ | 0.722                                       | 0.791 | 0.005 | 0.283                                       | 0.450 | 0.929 | 0.636                                       | 0.813 | 0.124 |
| MIP-1 $\beta$  | 0.722                                       | 0.560 | 0.010 | 0.457                                       | 0.345 | 0.477 | 0.814                                       | 1.000 | 0.239 |
| PDGF-BB        | 0.110                                       | 0.223 | 0.791 | 0.869                                       | 0.014 | 0.029 | 0.555                                       | 0.813 | 0.239 |
| RANTES         | 0.328                                       | 0.711 | 0.711 | 0.173                                       | 0.038 | 0.328 | 0.814                                       | 0.553 | 0.814 |
| TNF- $\alpha$  | 0.859                                       | 0.634 | 0.427 | 0.563                                       | 0.345 | 0.449 | 0.076                                       | 0.097 | 0.906 |
| VEGF           | 0.859                                       | 0.958 | 0.314 | 0.741                                       | 0.450 | 0.424 | 0.480                                       | 0.814 | 0.637 |
